# Supplementary material for: Transport of a kinesin-cargo pair along microtubules into dendritic spines undergoing synaptic plasticity
Source: PubMed Central journal article supplement (PMC5411814; doi:10.1038/ncomms12741), 2016-09-23
Supplement: ncomms12741-s1.pdf [file ncomms12741-s1.pdf]

1 **Supplementary Figures and Legends**

2

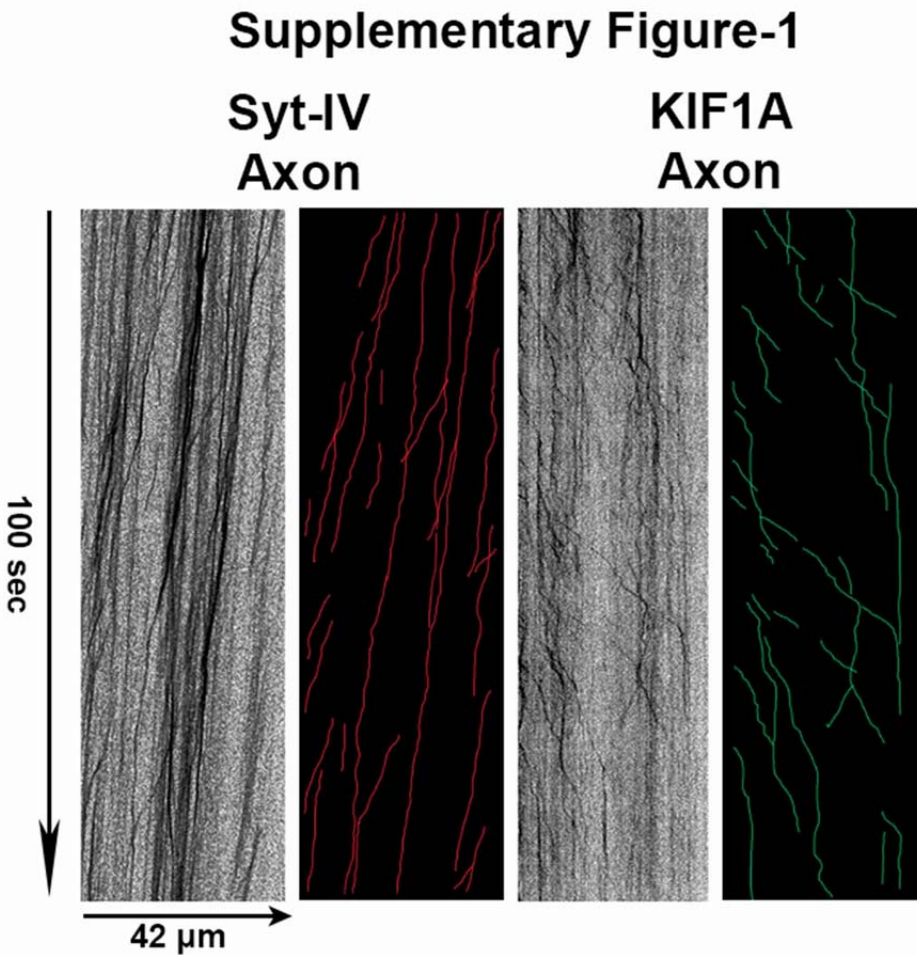

3

4 **Supplementary Figure 1 KIF1A and syt-IV move in opposing directions in axons.**

5 Kymographs were made of eGFP-KIF1A and mCherry-syt-IV movement in axons from time-lapse sessions collected at 5-10 Hz for 100 seconds. KIF1A moves primarily in the anterograde direction (selected traces in green), while syt-IV moves retrogradely (selected traces in red) toward the neuron cell body. These data indicate that, unlike in the dendrites (Fig. 1), KIF1A and syt-IV do not co-localize and move together in axons.

10

11

## Supplementary Figure-2

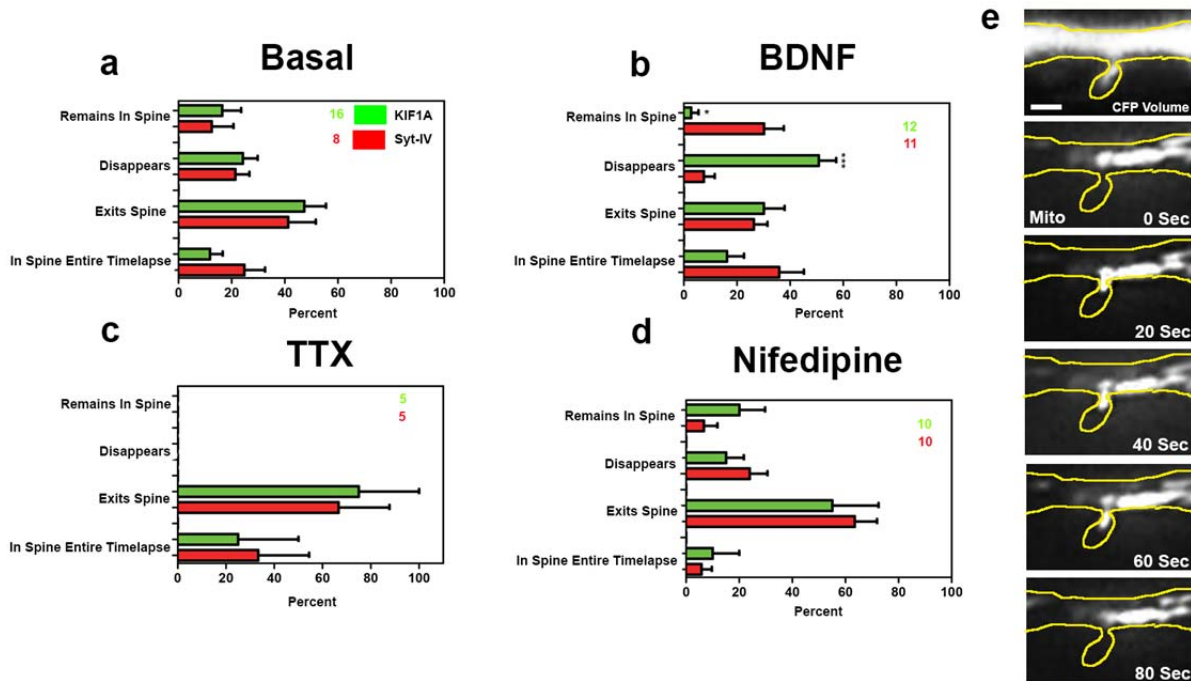

12 **Supplementary Figure 2 Behavior of KIF1A puncta, syt-IV puncta and mitochondria in**  
 13 **dendritic spines. (a)** At basal levels KIF1A and syt-IV demonstrated similar behaviors in  
 14 dendritic spines and remained in the spine for the duration of the time lapse after the initial  
 15 invasion  $21.9 \pm 10.8\%$  and  $12.5 \pm 8.2\%$  of the time while disappearing from the spine  $28.5 \pm$   
 16  $8.5\%$  and  $21.4 \pm 5.3\%$  of the time, respectively. KIF1A and syt-IV exited the spine  $50.2 \pm$   
 17  $11.2\%$  and  $41.3 \pm 10.4\%$  of the time, while  $12.8 \pm 5.3\%$  and  $24.8 \pm 7.8\%$  of KIF1A and syt-IV puncta  
 18 were in the spines prior to the start of imaging and remained in the spine during the entire time  
 19 lapse (n=14). **(b)** After a 20-minute bath application of BDNF, the percentage of KIF1A that  
 20 remained in the spine after invasion was significantly less ( $2.8 \pm 2.7\%$ ,  $p = 0.0306$ ) than was  
 21 seen for syt-IV ( $30.2 \pm 7.5\%$ ) and the percentage of KIF1A puncta that disappeared was  
 22 significantly more ( $50.8 \pm 6.6\%$ ,  $p = 0.0011$ ) than syt-IV ( $6.9 \pm 3.8\%$ ). There was no statistical  
 23 difference between the percentages of puncta observed to exit the spine ( $30.2 \pm 7.7\%$  for KIF1A  
 24 and  $26.4 \pm 5.1\%$  for syt-IV  $p = 0.9999$ ) or that were in the spine the entire duration of the time  
 25 lapse ( $16.3 \pm 6.4\%$  for KIF1A and  $35.9 \pm 9.3\%$  for syt-IV,  $p = 0.6008$ , n = 12). **(c)** No KIF1A or  
 26 syt-IV puncta were observed to remain in the spine after the initial invasion or disappear with a  
 27 20-minute bath application of TTX. However, a large percentage of KIF1A ( $75.0 \pm 25.0\%$ ) and  
 28 syt-IV puncta ( $66.7 \pm 21.1\%$ ) exited the spine after invading, while a smaller percentage was in  
 29 the spines the entire duration of the time lapse ( $25.0 \pm 25.0\%$  for KIF1A and  $33.3 \pm 21.1\%$  for  
 30 syt-IV, n=6). **(d)** KIF1A and syt-IV behaved similarly after 24-hour nifedipine treatment with the  
 31 majority of events exiting the spines ( $55.1 \pm 17.4\%$  for KIF1A and  $63.6 \pm 8.3\%$  for syt-IV;  $p =$   
 32  $0.7615$ ) and a lesser percent remaining in the spines ( $20.1 \pm 9.7\%$  for KIF1A and  $6.7 \pm 5.1\%$  for  
 33 syt-IV;  $p = 0.9999$ ), disappearing ( $15.1 \pm 6.7\%$  for KIF1A and  $24.0 \pm 6.7\%$  for syt-IV;  $p =$   
 34  $0.9999$ ), or in the spine the entire time lapse ( $10.0 \pm 6.7\%$  for KIF1A and  $5.8 \pm 4.0\%$  for syt-IV,  $p =$   
 35  $0.9999$ , n = 10). **(e)** An example time-lapse series showing that mitochondria do not penetrate  
 36 deep into the spine head. Scale bar, 2µm. A one-way analysis of variance with Tukey's *post-*  
 37 *hoc* was used. Data reported as mean  $\pm$  s.e.m. Asterisks above data points indicate significance  
 38 relative to controls.

## Supplementary Figure-3

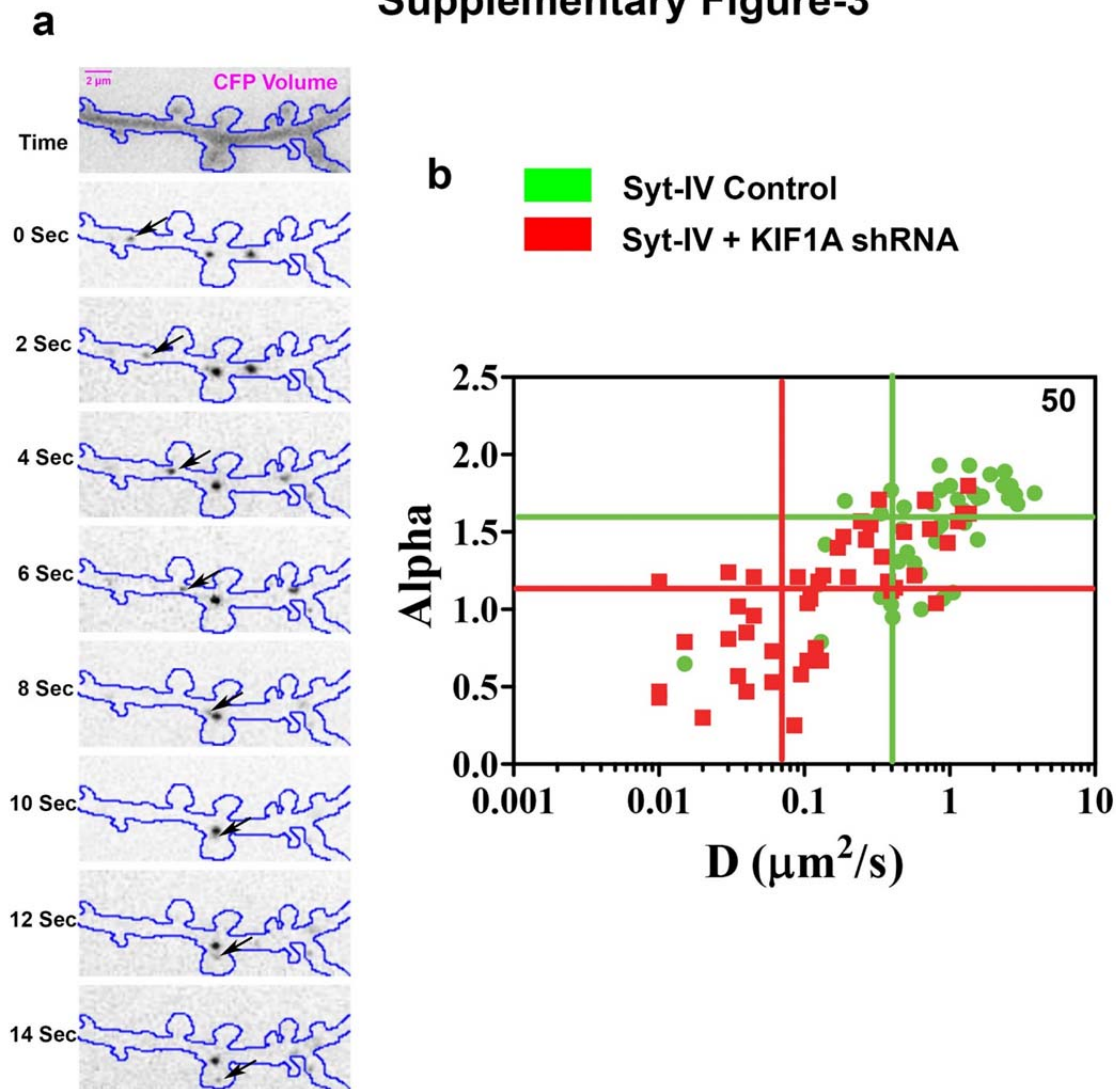

40  
 41 **Supplemental Figure 3 Syt-IV moves in the dendritic shaft and into spines in a directed**  
 42 **motion. (a)** Images showing a syt-IV punctum (arrows) processively moving along a stretch of  
 43 dendrite into a dendritic spine (scale bar 2  $\mu\text{m}$ ). **(b)** Mean square displacement (MSD) analysis  
 44 of syt-IV in control neurons (green) and syt-IV in cells expressing KIF1A shRNA (red). Syt-IV  
 45 puncta in neurons expressing KIF1A shRNA have a significantly reduced diffusion coefficient  
 46 (from  $1.1 \pm 0.05 \mu\text{m}^2/\text{s}$  in controls to  $0.3 \pm 0.13 \mu\text{m}^2/\text{s}$  in shRNA expressing cells,  $p = 0.0001$ ,  $n =$   
 47 50 tracks) and diffusive exponent,  $\alpha$ , (from  $1.6 \pm 0.06$  in controls to  $1.1 \pm 0.05$  in neurons  
 48 expressing KIF1A shRNA,  $P = 0.0001$ ,  $n = 50$  tracks) compared to controls. These data indicate  
 49 that syt-IV puncta move in a predominantly directed manner with a constant velocity in control  
 50 cells, but movement of some populations becomes more consistent with random diffusion in  
 51 cells expressing shRNA. A student's t-test was used to determine significance. Data reported  
 52 as mean  $\pm$  s.e.m.

## Supplementary Figure-4

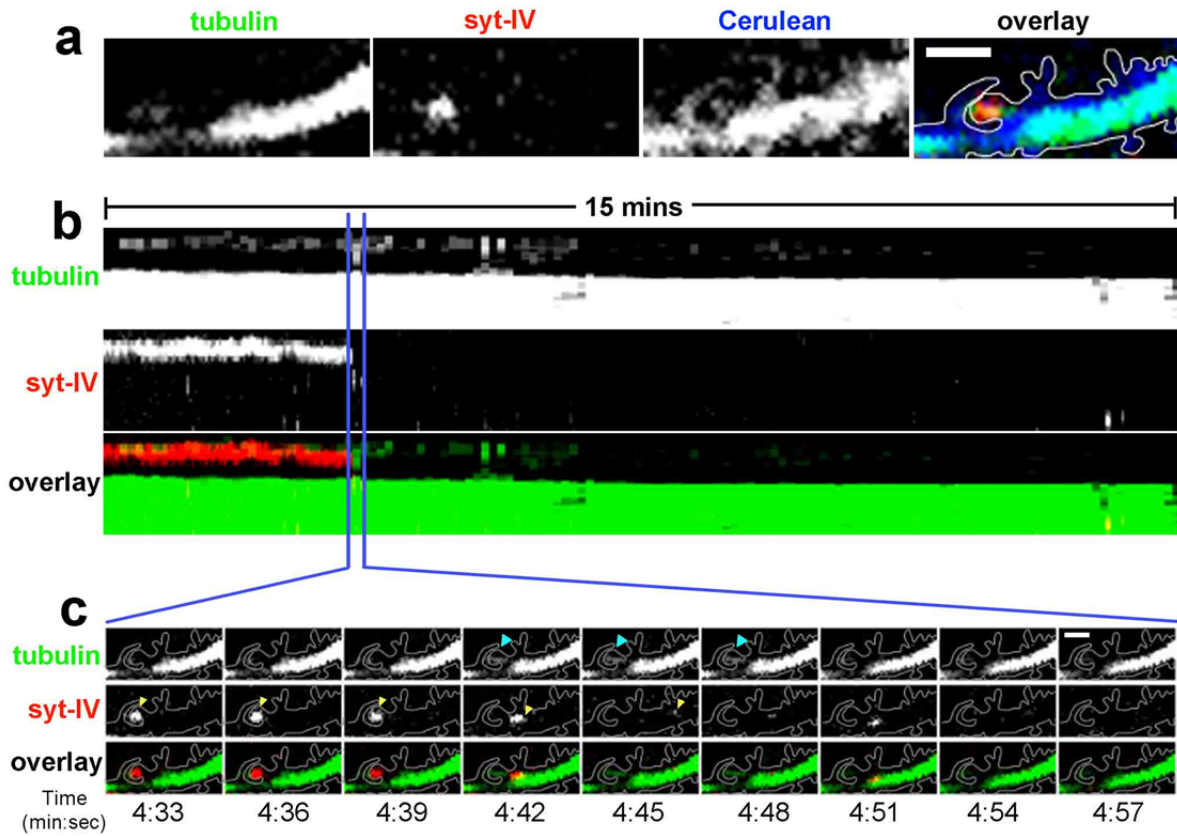

53  
54 **Supplementary Figure 4 Syt-IV exits dendritic spines after MT invasions.** (a) Images  
55 showing tubulin, syt-IV, and a CFP volume fill (scale bar 2  $\mu$ m). (b) Kymograph of a MT entering  
56 a dendritic spine followed by the exit of syt-IV from the same spine. (c) Time-lapse images  
57 demonstrating a MT invasion of a dendritic spine (cyan arrows) followed by the exit of a syt-IV  
58 puncta along the MT track (yellow arrows).

## Supplementary Figure-5

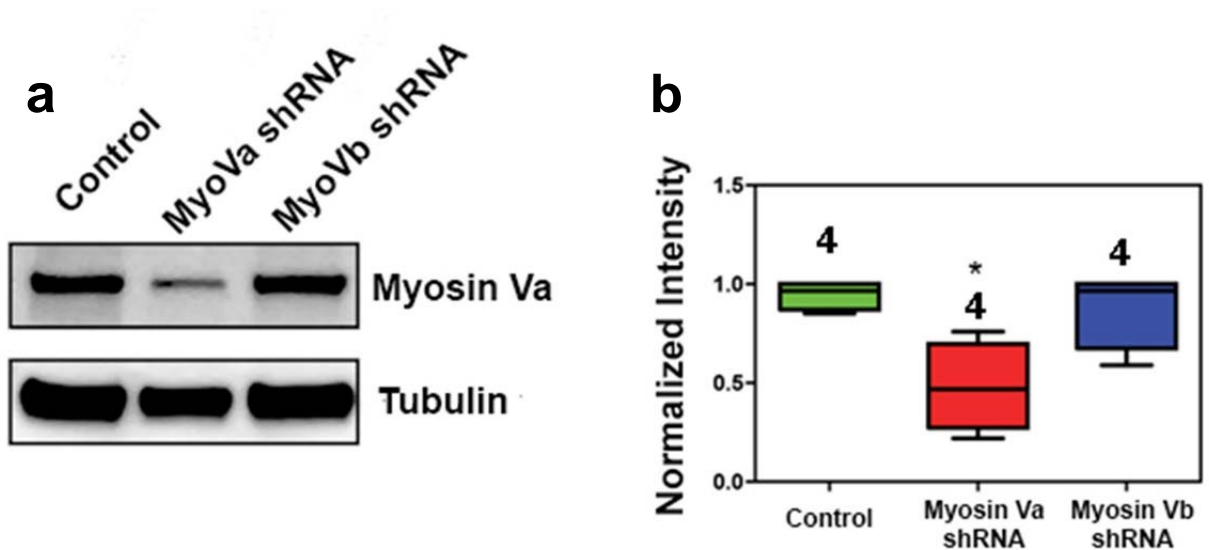

59  
60 **Supplementary Figure 5 shRNA mediated knock down of myosin Va.** (a) Western blot  
61 demonstrating the knockdown of myosin Va by shRNA. E18.5 primary rat hippocampal neurons  
62 were transfected with the shRNA plasmid, control plasmids, or myosin Vb shRNA plasmids by  
63 nucleofection, with a transfection efficiency between 40%-60%, and harvested 72 hours after  
64 transfection. (b) Quantification of the Western blot demonstrates that the normalized intensity of  
65 myosin Va bands was significantly reduced in cells expressing the myosin Va shRNA ( $0.5 \pm 0.1$   
66 AU,  $p = 0.0166$   $n = 4$ ) compared to cells transfected with the control plasmid ( $0.95 \pm 0.04$  AU) or  
67 myosin Vb shRNA ( $0.9 \pm 0.2$  AU). Given the low transfection efficiency, these numbers are an  
68 underestimate of the actual knock down efficiency. A one-way analysis of variance with Tukey's  
69 *post-hoc* was used. Data reported as mean  $\pm$  s.e.m. Asterisks above data points indicate  
70 significance relative to controls.

71

## Supplementary Figure-6

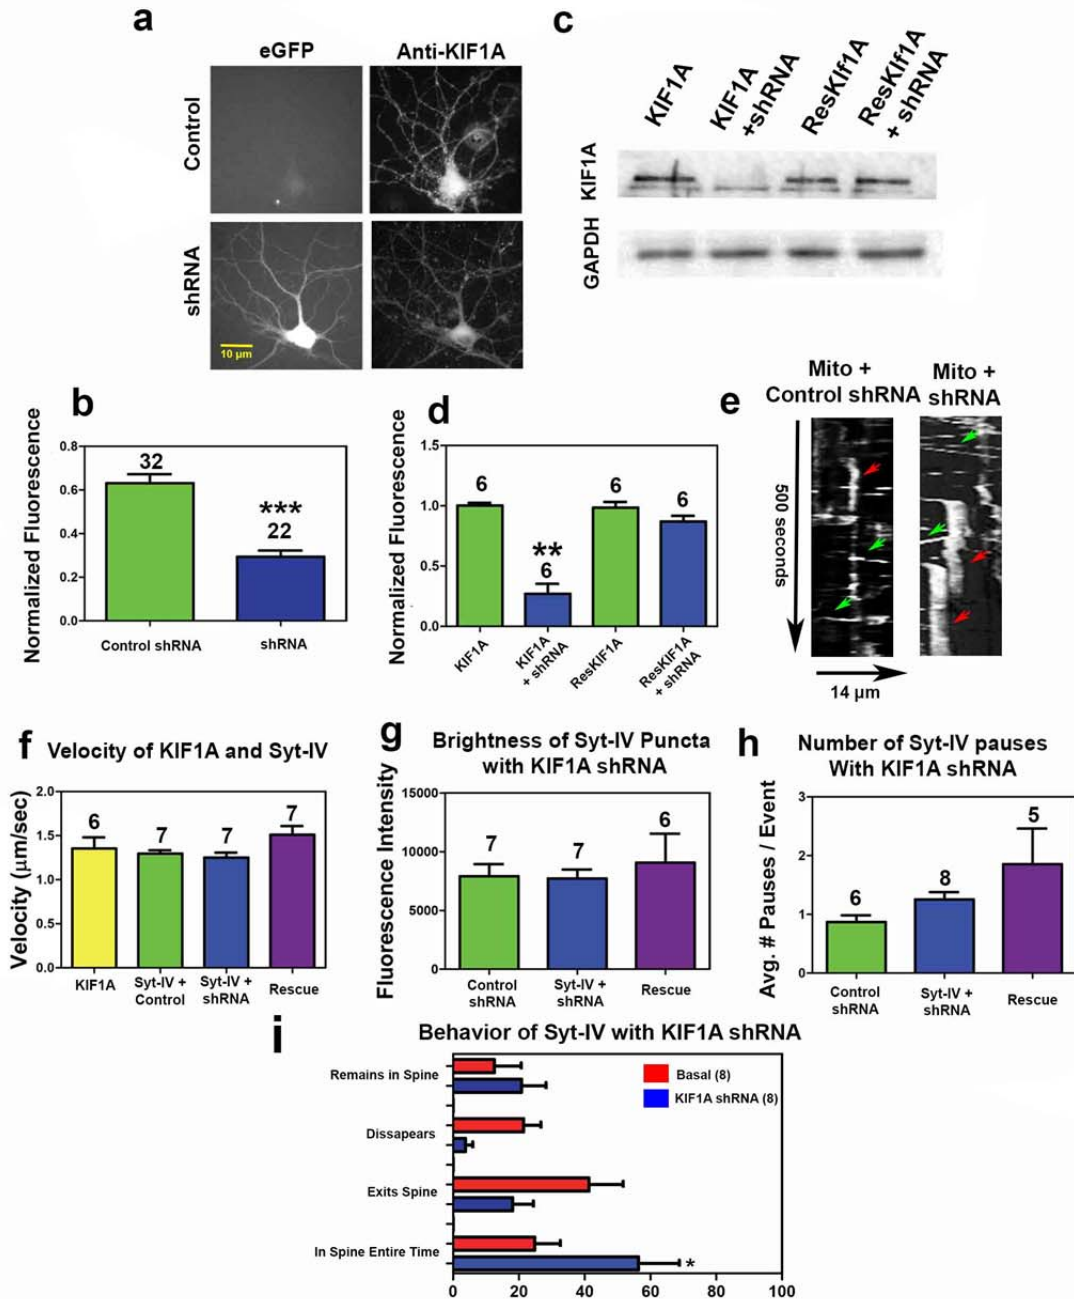

72

73 **Supplementary Figure 6** shRNA mediated knockdown of KIF1A does not cause changes  
 74 in mitochondria or velocity, brightness and number of syt-IV pauses in dendrites. (a)  
 75 Immunocytochemistry was used to measure the fluorescence intensity of endogenous KIF1A in  
 76 control neurons (top) and neurons expressing the eGFP-pSuper construct containing shRNA  
 77 against KIF1A (bottom; scale bar is 10 μm). (b) The normalized fluorescence intensity of KIF1A  
 78 in neurons expressing KIF1A shRNA was significantly less ( $0.29 \pm 0.03$ ,  $p = 0.0001$ ,  $n = 22$ ) than  
 79 neurons not expressing the shRNA construct ( $0.63 \pm 0.04$ ,  $n = 32$ ). (c) Western blotting was also  
 80 used to quantify the efficiency of KIF1A knockdown by expressing the KIF1A construct and the

81 shRNA-resistant mutant construct (ResKIF1A) mutant in HEK293 cells, with or without the  
82 KIF1A shRNA construct. **(d)** The normalized intensity of the bands in Western blots were  
83 measured in ImageJ, and cells expressing both the KIF1A construct and shRNA were of  
84 significantly lower intensity ( $0.27 \pm 0.08$ ,  $p = 0.0014$ ,  $n= 6$ ) than those of either KIF1A alone  
85 ( $1.00 \pm 0.02$ ,  $n=6$ ), the rescue mutant alone ( $0.99 \pm 0.05$ ,  $n= 6$ ), or the rescue mutant with  
86 shRNA ( $0.87 \pm 0.12$ ,  $n= 6$ ). **(e)** Kymographs of mitochondria moving through the dendritic shaft  
87 of control neurons (left) and neurons expressing KIF1A shRNA (right). In controls and shRNA  
88 expressing neurons mitochondria moved in a similar manner having both stationary (red arrows)  
89 and motile (green arrows) events in approximately the same ratios and moving at similar  
90 velocities between conditions. **(f)** KIF1A shRNA had no significant effect on the velocity of syt-IV  
91 puncta ( $1.3 \pm 0.1 \mu\text{m/s}$ ,  $p = 0.7809$ ,  $n= 7$ ) as compared to control neurons ( $1.3 \pm 0.04 \mu\text{m/s}$ ,  $n=$   
92  $7$ ), which were also similar to the velocity of KIF1A puncta ( $1.3 \pm 0.1 \mu\text{m/s}$ ,  $p = 0.9382$ ,  $n= 6$ ).  
93 The velocity of syt-IV puncta was also statistically similar to controls when expressing both  
94 KIF1A shRNA and the KIF1A rescue construct ( $1.5 \pm 0.1 \mu\text{m/s}$ ,  $p = 0.9401$ ,  $n= 7$ ). **(g)** The  
95 brightness ( $7907 \pm 1040$  fluorescent units for control neurons,  $7720 \pm 766$  fluorescent units for  
96 shRNA neurons, and  $9071 \pm 2455$  fluorescent units for rescue neurons,  $p = 0.9050$  and  $p =$   
97  $0.3952$ ,  $n= 7$ ,  $7$ , and  $6$ , respectively) and **(h)** average number of pauses per event ( $0.87 \pm 0.11$   
98 pauses/event for control neurons,  $1.3 \pm 0.1$ ,  $p = 0.9999$ , pauses/event for shRNA neurons, and  
99  $1.9 \pm 0.6$  pauses/event for rescue neurons,  $p = 0.9999$ ,  $n= 6$ ,  $8$ , and  $5$ , respectively) of syt-IV  
100 puncta moving along the dendritic shaft were also unaffected by the expression of KIF1A  
101 shRNA and were statistically similar to control and rescued neurons. **(i)** There was a higher  
102 percentage of Syt-IV puncta in spines the entire time lapse with KIF1A shRNA expression (blue  
103 bars) as compared to control neurons (red bars), from  $24.8 \pm 7.8\%$  in control neurons to  $56.4 \pm$   
104  $9.7\%$  ( $p = 0.0483$ ,  $n= 8$ ). Asterisks above data points indicate significance relative to controls.  
105 For panel **b**, a student's t-test was used to determine significance. For panels **d**, **f**, **g**, **h**, and **i**, a  
106 one-way analysis of variance with Tukey's *post-hoc* test was used. All graphs show mean  $\pm$   
107 s.e.m.

108

109

110

111

112

113

## Supplementary Figure-7

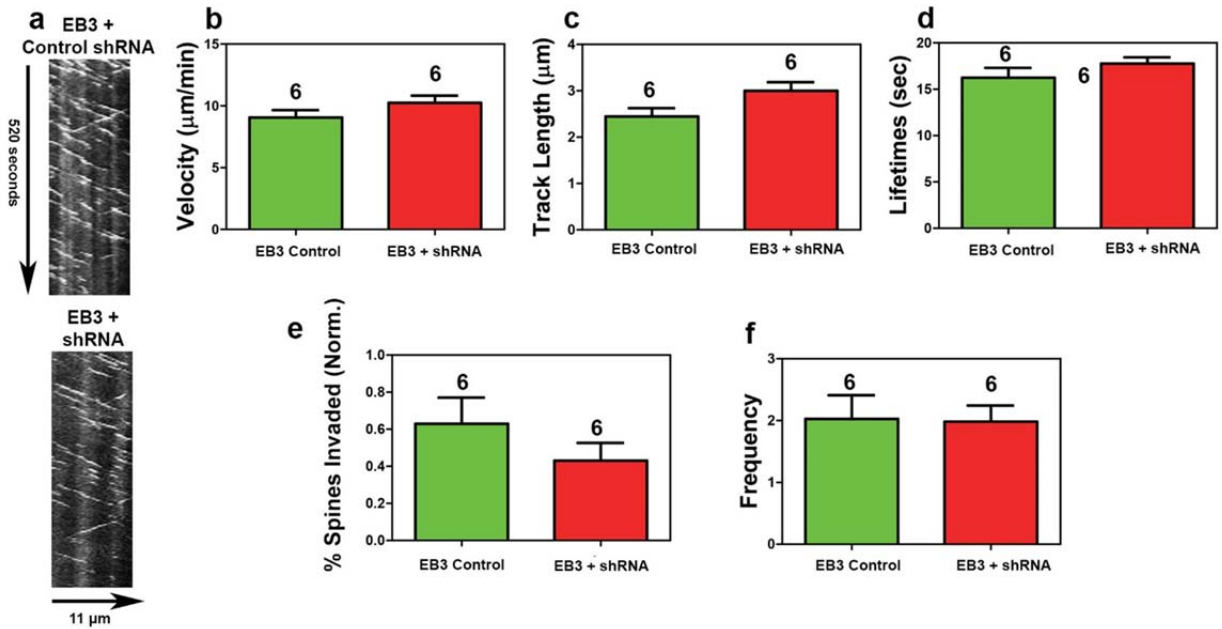

114  
 115 **Supplementary Figure 7 KIF1A knock down does not affect MT dynamics in the dendritic**  
 116 **shaft, or the rate and frequency of MT spine invasions. (a)** Kymographs of the movement of  
 117 the MT plus end binding protein EB3 through the dendritic shaft. **(b)** Velocities of EB3 comets in  
 118 neurons expressing KIF1A shRNA ( $10.2 \pm 0.6 \mu\text{m/s}$ ,  $p = 0.4149$ ,  $n = 6$ ) were statistically similar  
 119 to those in control neurons ( $9.1 \pm 0.6 \mu\text{m/s}$ ,  $n = 6$ ). **(c)** KIF1A shRNA also had no effect on the  
 120 EB3 track length ( $2.4 \pm 0.2 \mu\text{m}$  for control neurons and  $3.0 \pm 0.2 \mu\text{m}$  for shRNA expressing  
 121 neurons,  $p = 0.0792$ ,  $n = 6$ ), **(d)** or the lifetimes of the EB3 comets ( $16.2 \pm 1.1\text{s}$  for control  
 122 neurons and  $17.8 \pm 0.7\text{s}$  for shRNA expressing neurons,  $p = 0.0852$ ,  $n = 6$ ). Approximately 200-  
 123 300 EB3 comets were analyzed for each neuron ( $n$  value). **(e)** No statistically significant  
 124 differences were observed in the percentage of spines invaded by EB3 ( $p = 0.5556$ ). The  
 125 normalized percentage of spines invaded by EB3 was  $0.6 \pm 0.1\%$  for control neurons and  $0.4 \pm$   
 126  $0.1\%$  for neurons expressing shRNA ( $n = 6$ ). **(f)** Invasion frequencies of EB3 were likewise  
 127 unaffected by KIF1A shRNA with frequencies for control neurons being  $2.0 \pm 0.4$  and  $2.0 \pm 0.3$   
 128 for shRNA expressing neurons ( $p = 0.9284$ ). A student's t-test was used to determine  
 129 significance. All graphs show mean  $\pm$  s.e.m.

130



## Supplementary Figure-8

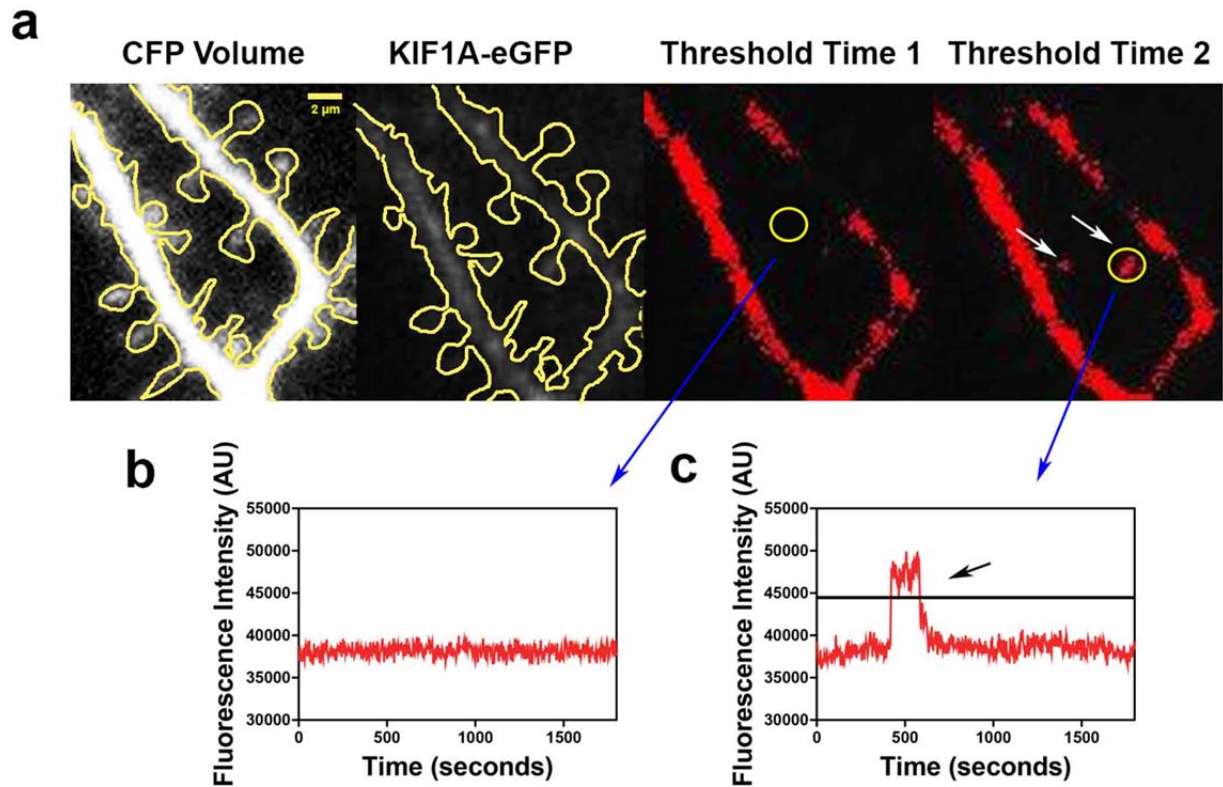

131  
132 **Supplementary Figure 8 Analysis of spine invasions using thresholding.** (a) Example of a  
133 neuron expressing eGFP-KIF1A before thresholding (panel two), after thresholding but prior to  
134 an exocytosis event (panel three), and after two exocytosis events (white arrows panel four).  
135 The yellow circle in panel three is a ROI measuring background fluorescence and corresponds  
136 to the fluorescence intensity measurement in (scale bar is 2  $\mu\text{m}$ ) (b), while the yellow circle in  
137 panel four is a ROI measuring the fluorescence of an exocytosis event corresponding to the  
138 measurements in (c). The threshold was set to ten standard deviations above the background  
139 (black line in c).

140

141

142

143

144

145

## Supplementary Figure-9

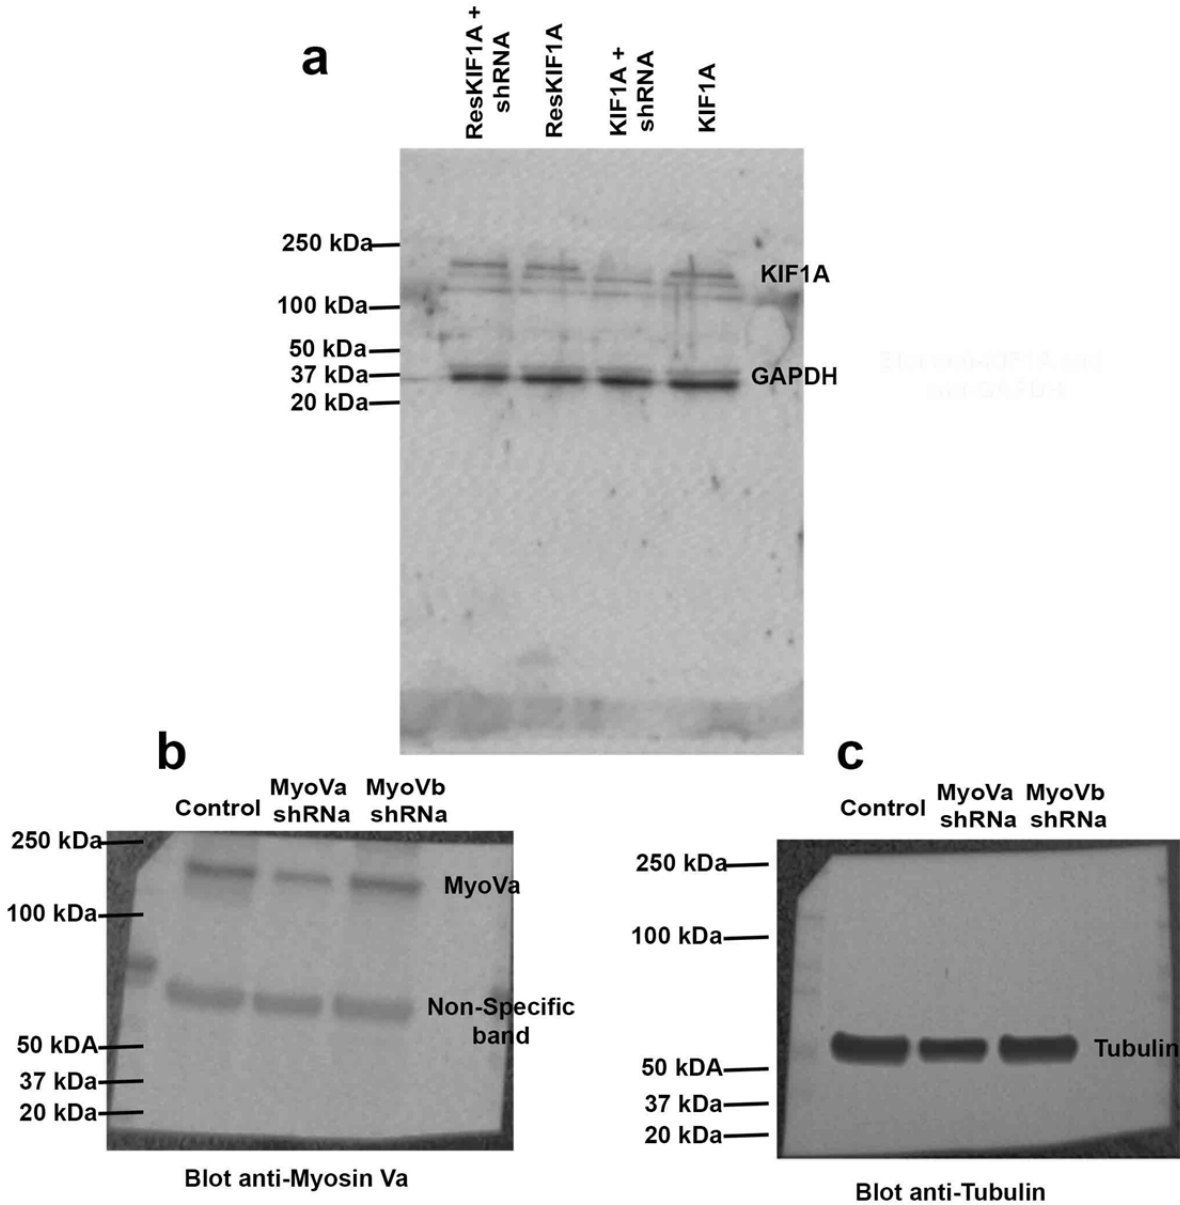

146

147 **Supplementary Figure 9 full KIF1A and Myosin Va western blots.** (a) Full Western blot of  
 148 KIF1A expressed in HEK cells with KIF1A + shRNA, KIF1A rescue, and KIF1A rescue + shRNA.  
 149 Westerns were co-stained with GAPDH as a loading control. (b) Full Western blot from rat  
 150 hippocampal cells nucleofected with control plasmids, myosin Va shRNA, or myosin Vb shRNA  
 151 as an additional control. (c) The Western in panel b was stripped and re-blotted for  $\alpha$ -tubulin for  
 152 a loading control.
